# Supplementary material
Source: publisher figshare collection journal article supplement (https://aacr.figshare.com/articles/dataset/_/22433286)

**S0 tumor**

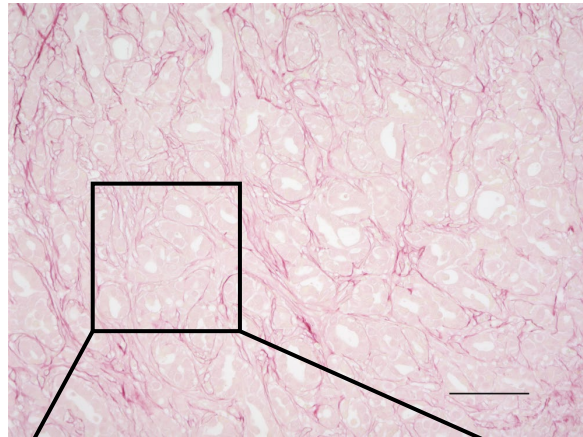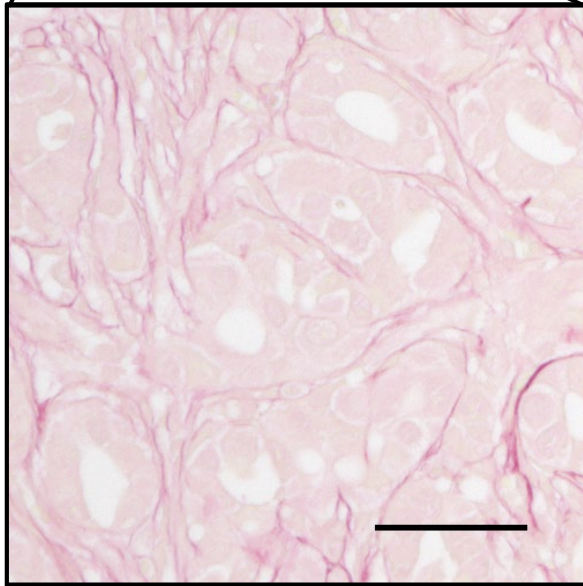

**S3 tumor**

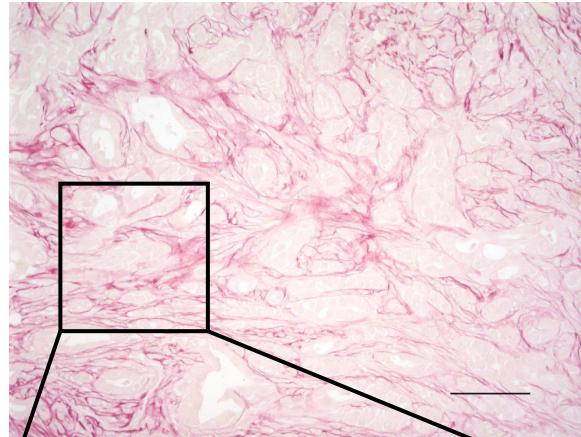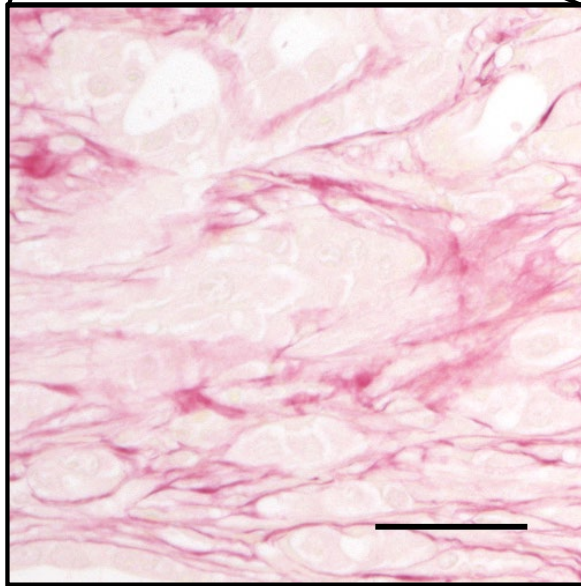

**S5 tumor**

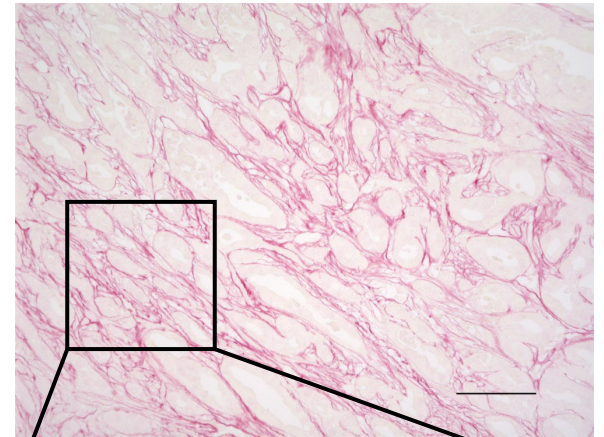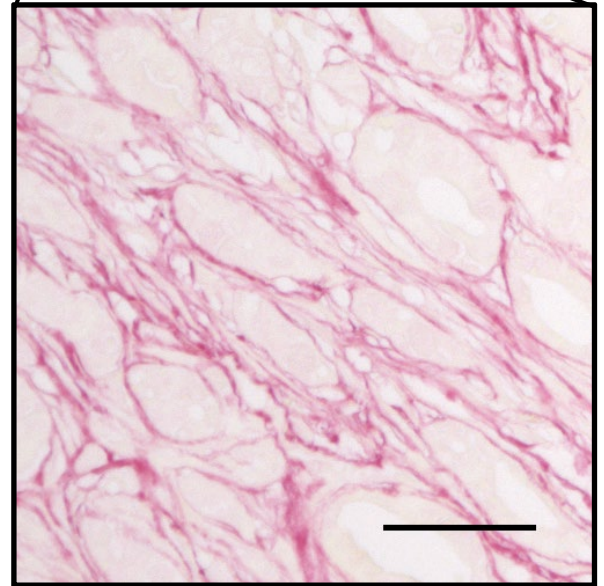

Supplement: Supplementary file 1 [file 39879723]
